# Supplementary material
Source: MDPI journal article supplement (https://www.mdpi.com/2075-5309/13/4/921)
Supplement: s1 [file s1]

| SUPPLEMENT S2: WQSRA PRE-PROJECT CHECKLIST (page 1 of 2)                                                                                                                                                                                                                                                                                                                                                                                                                                                                                                                                                                                                                                                                                                                                                             |    |                                                                                    |               |
|----------------------------------------------------------------------------------------------------------------------------------------------------------------------------------------------------------------------------------------------------------------------------------------------------------------------------------------------------------------------------------------------------------------------------------------------------------------------------------------------------------------------------------------------------------------------------------------------------------------------------------------------------------------------------------------------------------------------------------------------------------------------------------------------------------------------|----|------------------------------------------------------------------------------------|---------------|
| Water Disruptive Event Project Number:                                                                                                                                                                                                                                                                                                                                                                                                                                                                                                                                                                                                                                                                                                                                                                               |    | Facility:                                                                          |               |
| Event Name:                                                                                                                                                                                                                                                                                                                                                                                                                                                                                                                                                                                                                                                                                                                                                                                                          |    | Department/Location:                                                               |               |
| Date:                                                                                                                                                                                                                                                                                                                                                                                                                                                                                                                                                                                                                                                                                                                                                                                                                |    | Project Scope of Work Description:                                                 |               |
| <p>Use this document in conjunction with Water Quality and Safety Control Risk Assessment (WQSRA) tool for improving water quality and safety associated with water disruptive events. The objective is to reduce risk of elevated water chemistry levels and/or waterborne pathogen growth and spread in building water distribution systems (BWDS) from water disruptive events (natural disasters or man-made events). Please identify all risk factors within the water disruptive event project scope for civil engineering and building engineering systems. The Pre-project checklist should be reviewed by the water management program (WMP) team to determine likely risk factors. Describe additional information in the Note(s) Section to clarify extent of water disruptive event's project scope.</p> |    |                                                                                    |               |
| YES                                                                                                                                                                                                                                                                                                                                                                                                                                                                                                                                                                                                                                                                                                                                                                                                                  | NO | CIVIL WATER RISK FACTORS                                                           | NOTES SECTION |
|                                                                                                                                                                                                                                                                                                                                                                                                                                                                                                                                                                                                                                                                                                                                                                                                                      |    | <b>Excavation</b>                                                                  |               |
|                                                                                                                                                                                                                                                                                                                                                                                                                                                                                                                                                                                                                                                                                                                                                                                                                      |    | Potential for soil and sediment invasion                                           |               |
|                                                                                                                                                                                                                                                                                                                                                                                                                                                                                                                                                                                                                                                                                                                                                                                                                      |    | Describe location(s)                                                               |               |
|                                                                                                                                                                                                                                                                                                                                                                                                                                                                                                                                                                                                                                                                                                                                                                                                                      |    | <b>Underground utility connections</b>                                             |               |
|                                                                                                                                                                                                                                                                                                                                                                                                                                                                                                                                                                                                                                                                                                                                                                                                                      |    | Potential for soil and sediment invasion                                           |               |
|                                                                                                                                                                                                                                                                                                                                                                                                                                                                                                                                                                                                                                                                                                                                                                                                                      |    | <b>Repressurization of building main / point-of-entry water system</b>             |               |
|                                                                                                                                                                                                                                                                                                                                                                                                                                                                                                                                                                                                                                                                                                                                                                                                                      |    | Will the building main entry be shut-down or experience re-pressurization?         |               |
|                                                                                                                                                                                                                                                                                                                                                                                                                                                                                                                                                                                                                                                                                                                                                                                                                      |    | <b>Site/Civil Water service disruption</b>                                         |               |
|                                                                                                                                                                                                                                                                                                                                                                                                                                                                                                                                                                                                                                                                                                                                                                                                                      |    | New construction tie-ins                                                           |               |
|                                                                                                                                                                                                                                                                                                                                                                                                                                                                                                                                                                                                                                                                                                                                                                                                                      |    | Replacement valves                                                                 |               |
|                                                                                                                                                                                                                                                                                                                                                                                                                                                                                                                                                                                                                                                                                                                                                                                                                      |    | Hydrants                                                                           |               |
|                                                                                                                                                                                                                                                                                                                                                                                                                                                                                                                                                                                                                                                                                                                                                                                                                      |    | Meters                                                                             |               |
|                                                                                                                                                                                                                                                                                                                                                                                                                                                                                                                                                                                                                                                                                                                                                                                                                      |    | Pumping failures                                                                   |               |
|                                                                                                                                                                                                                                                                                                                                                                                                                                                                                                                                                                                                                                                                                                                                                                                                                      |    | Pipeline breaks                                                                    |               |
|                                                                                                                                                                                                                                                                                                                                                                                                                                                                                                                                                                                                                                                                                                                                                                                                                      |    | Other system repairs                                                               |               |
|                                                                                                                                                                                                                                                                                                                                                                                                                                                                                                                                                                                                                                                                                                                                                                                                                      |    | Emergency conditions                                                               |               |
|                                                                                                                                                                                                                                                                                                                                                                                                                                                                                                                                                                                                                                                                                                                                                                                                                      |    | <b>Lengthy underground piping connections</b>                                      |               |
|                                                                                                                                                                                                                                                                                                                                                                                                                                                                                                                                                                                                                                                                                                                                                                                                                      |    | Site routing of water utility piping                                               |               |
|                                                                                                                                                                                                                                                                                                                                                                                                                                                                                                                                                                                                                                                                                                                                                                                                                      |    | Fire hydrant locations and piping routing with dead-ends                           |               |
|                                                                                                                                                                                                                                                                                                                                                                                                                                                                                                                                                                                                                                                                                                                                                                                                                      |    | Distance from building main connection to the street connection/invert             |               |
|                                                                                                                                                                                                                                                                                                                                                                                                                                                                                                                                                                                                                                                                                                                                                                                                                      |    | <b>Vibration activities</b>                                                        |               |
|                                                                                                                                                                                                                                                                                                                                                                                                                                                                                                                                                                                                                                                                                                                                                                                                                      |    | Pile Driving/structural foundation                                                 |               |
|                                                                                                                                                                                                                                                                                                                                                                                                                                                                                                                                                                                                                                                                                                                                                                                                                      |    | Jackhammering                                                                      |               |
|                                                                                                                                                                                                                                                                                                                                                                                                                                                                                                                                                                                                                                                                                                                                                                                                                      |    | Saw cutting                                                                        |               |
|                                                                                                                                                                                                                                                                                                                                                                                                                                                                                                                                                                                                                                                                                                                                                                                                                      |    | What buildings are these activities adjacent to? (i.e. sensitive populations)      |               |
|                                                                                                                                                                                                                                                                                                                                                                                                                                                                                                                                                                                                                                                                                                                                                                                                                      |    | <b>Demolition Activities</b>                                                       |               |
|                                                                                                                                                                                                                                                                                                                                                                                                                                                                                                                                                                                                                                                                                                                                                                                                                      |    | Creates air plumes of dust or water aerosoles toward building occupant areas       |               |
|                                                                                                                                                                                                                                                                                                                                                                                                                                                                                                                                                                                                                                                                                                                                                                                                                      |    | Drift of debris toward cooling towers                                              |               |
|                                                                                                                                                                                                                                                                                                                                                                                                                                                                                                                                                                                                                                                                                                                                                                                                                      |    | Drift of debris toward HVAC intake vents                                           |               |
|                                                                                                                                                                                                                                                                                                                                                                                                                                                                                                                                                                                                                                                                                                                                                                                                                      |    | <b>Demolishing building water system components</b>                                |               |
|                                                                                                                                                                                                                                                                                                                                                                                                                                                                                                                                                                                                                                                                                                                                                                                                                      |    | Impacting other building water supply connection points                            |               |
|                                                                                                                                                                                                                                                                                                                                                                                                                                                                                                                                                                                                                                                                                                                                                                                                                      |    | Other Site/Civil utility demolition activities                                     |               |
|                                                                                                                                                                                                                                                                                                                                                                                                                                                                                                                                                                                                                                                                                                                                                                                                                      |    | <b>Demolishing underground tunnels</b>                                             |               |
|                                                                                                                                                                                                                                                                                                                                                                                                                                                                                                                                                                                                                                                                                                                                                                                                                      |    | Utility                                                                            |               |
|                                                                                                                                                                                                                                                                                                                                                                                                                                                                                                                                                                                                                                                                                                                                                                                                                      |    | Walking/ passage / transportation                                                  |               |
|                                                                                                                                                                                                                                                                                                                                                                                                                                                                                                                                                                                                                                                                                                                                                                                                                      |    | <b>Construction equip with water reservoirs (i.e., typically spray activities)</b> |               |
|                                                                                                                                                                                                                                                                                                                                                                                                                                                                                                                                                                                                                                                                                                                                                                                                                      |    | Water tankers                                                                      |               |
|                                                                                                                                                                                                                                                                                                                                                                                                                                                                                                                                                                                                                                                                                                                                                                                                                      |    | Paving equipment                                                                   |               |
|                                                                                                                                                                                                                                                                                                                                                                                                                                                                                                                                                                                                                                                                                                                                                                                                                      |    | Spray nozzles                                                                      |               |
|                                                                                                                                                                                                                                                                                                                                                                                                                                                                                                                                                                                                                                                                                                                                                                                                                      |    | Misters                                                                            |               |
|                                                                                                                                                                                                                                                                                                                                                                                                                                                                                                                                                                                                                                                                                                                                                                                                                      |    | Other (e.g., power washing)                                                        |               |
|                                                                                                                                                                                                                                                                                                                                                                                                                                                                                                                                                                                                                                                                                                                                                                                                                      |    | <b>Water main disruptions</b>                                                      |               |
|                                                                                                                                                                                                                                                                                                                                                                                                                                                                                                                                                                                                                                                                                                                                                                                                                      |    | Opportunity for water main breakage                                                |               |
|                                                                                                                                                                                                                                                                                                                                                                                                                                                                                                                                                                                                                                                                                                                                                                                                                      |    | Length of shut down in hours/days                                                  |               |
|                                                                                                                                                                                                                                                                                                                                                                                                                                                                                                                                                                                                                                                                                                                                                                                                                      |    | Off-site construction of municipal water delivery system                           |               |
|                                                                                                                                                                                                                                                                                                                                                                                                                                                                                                                                                                                                                                                                                                                                                                                                                      |    | <b>Central Utility Plant Modifications/Alterations</b>                             |               |
|                                                                                                                                                                                                                                                                                                                                                                                                                                                                                                                                                                                                                                                                                                                                                                                                                      |    | Underground utility connections                                                    |               |
|                                                                                                                                                                                                                                                                                                                                                                                                                                                                                                                                                                                                                                                                                                                                                                                                                      |    | <b>Cooling Towers</b>                                                              |               |
|                                                                                                                                                                                                                                                                                                                                                                                                                                                                                                                                                                                                                                                                                                                                                                                                                      |    | Replacement                                                                        |               |
|                                                                                                                                                                                                                                                                                                                                                                                                                                                                                                                                                                                                                                                                                                                                                                                                                      |    | Addition                                                                           |               |
|                                                                                                                                                                                                                                                                                                                                                                                                                                                                                                                                                                                                                                                                                                                                                                                                                      |    | <b>Disinfection of underground utility connections or building</b>                 |               |
|                                                                                                                                                                                                                                                                                                                                                                                                                                                                                                                                                                                                                                                                                                                                                                                                                      |    | Does the project warrant consideration of building water main disinfection?        |               |
|                                                                                                                                                                                                                                                                                                                                                                                                                                                                                                                                                                                                                                                                                                                                                                                                                      |    | When during the project is this activity scheduled to be performed?                |               |

| SUPPLEMENT S2 - WQSRA PRE-PROJECT CHECKLIST (page 2 of 2) |    |                                                                                             |                                          |               |
|-----------------------------------------------------------|----|---------------------------------------------------------------------------------------------|------------------------------------------|---------------|
| YES                                                       | NO | BUILDING WATER RISK FACTORS                                                                 |                                          | NOTES SECTION |
|                                                           |    | <b>High Water Age / Stagnation Challenges (Circle One)</b>                                  |                                          |               |
|                                                           |    | How long will building water system experience dormancy or shut-downs?                      |                                          |               |
|                                                           |    | ≤ 7 calendar days                                                                           | ≤ 30 calendar days    > 30 calendar days |               |
|                                                           |    | <b>Inadequate residual disinfectant</b>                                                     |                                          |               |
|                                                           |    | Is existing disinfectant residual measurement between TRO > 0.5 ppm or < 4.0 ppm / or / FRO |                                          |               |
|                                                           |    | > .02 ppm or < 4.0 ppm?                                                                     |                                          |               |
|                                                           |    | <b>Provide verification of existing residual disinfectant measurements</b>                  |                                          |               |
|                                                           |    | Incoming municipal water main                                                               |                                          |               |
|                                                           |    | Pre - Post water softener                                                                   |                                          |               |
|                                                           |    | Pre - Post RO or other central filtration system                                            |                                          |               |
|                                                           |    | Return hot water loop system                                                                |                                          |               |
|                                                           |    | Distal distribution points on each floor of construction                                    |                                          |               |
|                                                           |    | <b>Confirm existing temperature control ranges</b>                                          |                                          |               |
|                                                           |    | Hot water storage temperature                                                               |                                          |               |
|                                                           |    | Hot water range (per WMP at fixture delivery)                                               |                                          |               |
|                                                           |    | Cold water range (per WMP)                                                                  |                                          |               |
|                                                           |    | Does the project utilize point-of-use mixing valves?                                        |                                          |               |
|                                                           |    | Are mixing valves set to correct temperature per WMP?                                       |                                          |               |
|                                                           |    | <b>Unoccupied areas with low or no use - post occupancy</b>                                 |                                          |               |
|                                                           |    | Shell or unoccupied areas with water in piping system                                       |                                          |               |
|                                                           |    | Low use or low occupancy areas with water in piping system                                  |                                          |               |
|                                                           |    | <b>Vibration activities</b>                                                                 |                                          |               |
|                                                           |    | Demolition                                                                                  |                                          |               |
|                                                           |    | Jackhammering                                                                               |                                          |               |
|                                                           |    | Saw cutting                                                                                 |                                          |               |
|                                                           |    | What departments are above, below, or downstream/near vibration activities?                 |                                          |               |
|                                                           |    | <b>Filtration and Screens</b>                                                               |                                          |               |
|                                                           |    | Equipment with filters and need for filter replacement                                      |                                          |               |
|                                                           |    | Fixtures with point-of-use filters and need for replacement                                 |                                          |               |
|                                                           |    | Identify need for new filtration for any equipment, devices, or fixtures                    |                                          |               |
|                                                           |    | Clean fixture components with catchment screens (e.g., shower heads, aerators)              |                                          |               |
|                                                           |    | <b>Efficiency or safety fixture design</b>                                                  |                                          |               |
|                                                           |    | Water system design for conservation measures                                               |                                          |               |
|                                                           |    | Participating in LEED, WELL, or FitWEL building rating systems                              |                                          |               |
|                                                           |    | Auto-fixtures (electronic, sensor, or push button)                                          |                                          |               |
|                                                           |    | Aerators or devices to reduce water flow                                                    |                                          |               |
|                                                           |    | Ligature-resistant fixtures (i.e., disability, behavioral health, security fixtures)        |                                          |               |
|                                                           |    | Other - mixed temperature fixtures, etc.                                                    |                                          |               |
|                                                           |    | <b>Repressurization (start-up and shut-down)</b>                                            |                                          |               |
|                                                           |    | Will any part of the building water system experience re-pressurization?                    |                                          |               |
|                                                           |    | <b>Building/Plumbing Water service disruption for repairs or maintenance</b>                |                                          |               |
|                                                           |    | New construction tie-ins                                                                    |                                          |               |
|                                                           |    | Replacement valves                                                                          |                                          |               |
|                                                           |    | Meters                                                                                      |                                          |               |
|                                                           |    | Pumping failures                                                                            |                                          |               |
|                                                           |    | Other system repairs or component replacement                                               |                                          |               |
|                                                           |    | <b>Construction equipment with water reservoirs typically with spray activities</b>         |                                          |               |
|                                                           |    | Showers                                                                                     |                                          |               |
|                                                           |    | Spray nozzles                                                                               |                                          |               |
|                                                           |    | Misters                                                                                     |                                          |               |
|                                                           |    | Other                                                                                       |                                          |               |
|                                                           |    | <b>Disinfection of building water distribution system</b>                                   |                                          |               |
|                                                           |    | Does the project warrant performing building water distribution system disinfection?        |                                          |               |
|                                                           |    | Have ports and isolation valves been installed for this section of the building?            |                                          |               |
|                                                           |    | When during the project is this activity scheduled to be performed?                         |                                          |               |
|                                                           |    | Is a supplemental disinfection system either existing or planned for the project?           |                                          |               |
|                                                           |    | <b>Central Utility System Modifications/Alterations</b>                                     |                                          |               |
|                                                           |    | Water heaters or heat exchangers                                                            |                                          |               |
|                                                           |    | Water storage                                                                               |                                          |               |
|                                                           |    | Hot water loop system                                                                       |                                          |               |
|                                                           |    | Boiler system                                                                               |                                          |               |
|                                                           |    | Other central building water system components                                              |                                          |               |
