# Supplementary material
Source: MDPI journal article supplement (https://www.mdpi.com/2075-5309/13/4/921)
Supplement: s1 [file s1]

Archive with 2 entries (2 files):
- 2023-03-30 Griffin et al 2277783 WQSRA S1 Toolkit Supplement S1.pdf
- 2023-03-30 Griffin et al 2277783 WQSRA S2 Pre-project Checklist Supplement S2.pdf
